# Supplementary material
Source: ML conference proceedings conference paper supplement (https://proceedings.neurips.cc/paper_files/paper/2018/hash/1cd138d0499a68f4bb72bee04bbec2d7-Abstract.html)
Supplement: Supplementary file [file 1cd138d0499a68f4bb72bee04bbec2d7-Supplemental.zip]

## A Proof of Proposition 4.1

*Proof.* Taking  $h(t) = f''(t)$ ,  $a = f'(0)$  and  $b = f(0)$  in Eq (5), we have

$$\begin{aligned}
& (f'(0)t + f(0)) + \int_0^\infty (t - \mu)_+ h(\mu) d\mu \\
&= (f'(0)t + f(0)) + \int_0^t (t - \mu) f''(\mu) d\mu \\
&= (f'(0)t + f(0)) + (t - \mu) f'(\mu) \Big|_{\mu=0}^t + \int_0^t f'(\mu) d\mu \quad (\text{integration by parts}) \\
&= f(0) + \int_0^t f'(\mu) d\mu \\
&= f(t).
\end{aligned}$$

Conversely, if  $f(t) = (at + b) + \int_0^\infty (t - \mu)_+ h(\mu) d\mu$ , calculation shows

$$f'(t) = a + \int_0^t h(\mu) d\mu, \quad f''(t) = h(t).$$

Therefore,  $f$  is convex if  $h$  is non-negative.

To prove Eq. (6), we substitute  $f(t) = f'(0)t + f(0) + \int_0^\infty (t - \mu)_+ f''(\mu) d\mu$  into the definition of  $f$ -divergence,

$$\begin{aligned}
D_f(p \parallel q) &= \mathbb{E}_q \left[ f \left( \frac{p(x)}{q(x)} \right) - f(1) \right] \\
&= \mathbb{E}_q \left[ f'(0) \frac{p(x)}{q(x)} + f(0) + \int_0^\infty (p(x)/q(x) - \mu)_+ f''(\mu) d\mu - f(1) \right] \\
&= [f'(0) + f(0) - f(1)] + \int_0^\infty \mathbb{E}_q \left[ \left( \frac{p(x)}{q(x)} - \mu \right)_+ \right] f''(\mu) d\mu.
\end{aligned}$$

This completes the proof.  $\square$

## B Proof of Proposition 4.2

*Proof.* By chain rule and the “score-function trick”  $\nabla_\theta q_\theta(x) = q_\theta(x) \nabla_\theta \log q_\theta(x)$ , we have

$$\begin{aligned}
\nabla_\theta D_f(p \parallel q_\theta) &= \mathbb{E}_{q_\theta} \left[ \nabla_\theta f \left( \frac{p(x)}{q_\theta(x)} \right) + f \left( \frac{p(x)}{q_\theta(x)} \right) \nabla_\theta \log q_\theta(x) \right] \\
&= \mathbb{E}_{q_\theta} \left[ f' \left( \frac{p(x)}{q_\theta(x)} \right) \nabla_\theta \left( \frac{p(x)}{q_\theta(x)} \right) + f \left( \frac{p(x)}{q_\theta(x)} \right) \nabla_\theta \log q_\theta(x) \right] \\
&= \mathbb{E}_{q_\theta} \left[ -f' \left( \frac{p(x)}{q_\theta(x)} \right) \left( \frac{p(x)}{q_\theta(x)} \right) \nabla_\theta \log q_\theta(x) + f \left( \frac{p(x)}{q_\theta(x)} \right) \nabla_\theta \log q_\theta(x) \right] \\
&= -\mathbb{E}_{q_\theta} \left[ \rho_f \left( \frac{p(x)}{q_\theta(x)} \right) \log q_\theta(x) \right],
\end{aligned}$$

where  $\rho_f(t) = f'(t)t - f(t)$ . This proves Eq. (7).

To prove Eq. (8), we note that for any function  $\phi$ , we have by the *reparamertization trick*:

$$\begin{aligned}
\nabla_\theta \mathbb{E}_{q_\theta} [\phi(x)] &= \mathbb{E}_{x \sim q_\theta} [\phi(x) \nabla_\theta \log q_\theta(x)] \quad (\text{score function}) \\
&= \mathbb{E}_{\xi \sim q_0} [\nabla_x \phi(x) \nabla_\theta g_\theta(\xi)] \quad (\text{reparameterization trick}),
\end{aligned}$$

where we assume  $x \sim q_\theta$  is generated by  $x = g_\theta(\xi)$ ,  $\xi \sim q_0$ .

Taking  $\phi(x) = \rho_f(p(x)/q_\theta(x))$  in Eq. (7), we have

$$\begin{aligned}
\nabla_\theta D_f(p \parallel q_\theta) &= -\mathbb{E}_{x \sim q_\theta} \left[ \rho_f \left( \frac{p(x)}{q_\theta(x)} \right) \nabla_\theta \log q_\theta(x) \right] \\
&= -\mathbb{E}_{\xi \sim q_0} \left[ \nabla_x \rho_f \left( \frac{p(x)}{q_\theta(x)} \right) \nabla_\theta g_\theta(\xi) \right] \\
&= -\mathbb{E}_{\xi \sim q_0} \left[ \rho'_f \left( \frac{p(x)}{q_\theta(x)} \right) \nabla_x \left( \frac{p(x)}{q_\theta(x)} \right) \nabla_\theta g_\theta(\xi) \right] \\
&= -\mathbb{E}_{\xi \sim q_0} \left[ \rho'_f \left( \frac{p(x)}{q_\theta(x)} \right) \left( \frac{p(x)}{q_\theta(x)} \right) \nabla_x \log \left( \frac{p(x)}{q_\theta(x)} \right) \nabla_\theta g_\theta(\xi) \right] \\
&= -\mathbb{E}_{\xi \sim q_0} \left[ \gamma_f \left( \frac{p(x)}{q_\theta(x)} \right) \nabla_x \log \left( \frac{p(x)}{q_\theta(x)} \right) \nabla_\theta g_\theta(\xi) \right],
\end{aligned}$$

where  $\gamma_f(t) = \rho'_f(t)t$ .

□

## C Tail-adaptive $f$ -divergence with Score-Function Gradient Estimator

Algorithm 2 summarizes our method using the score-function gradient estimator (7).

---

### Algorithm 2 Variational Inference with Tail-adaptive $f$ -Divergence (with Score Function Gradient)

---

Goal: Find the best approximation of  $p(x)$  from  $\{q_\theta : \theta \in \Theta\}$ .

Initialize  $\theta$ , set an index  $\beta$  (e.g.,  $\beta = -1$ ).

**for** iteration **do**

Draw  $\{x_i\}_{i=1}^n \sim q_\theta$ . Set  $\hat{F}(t) = \sum_{j=1}^n \mathbb{I}(p(x_j)/q(x_j) \geq t)/n$ , and  $\rho_i = \hat{F}(p(x_i)/q(x_i))^\beta$ .

Update  $\theta \leftarrow \theta + \epsilon \Delta\theta$ , where  $\epsilon$  is stepsize, and

$$\Delta\theta = \frac{1}{z_\rho} \sum_{i=1}^n [\rho_i \nabla_\theta \log q_\theta(x_i)],$$

where  $z_\rho = \sum_{i=1}^n \rho_i$ .

**end for**

---

## D More Results for Bayesian Neural Network

Table 2 shows more results in Bayesian networks with more choices of  $\alpha$  in  $\alpha$ -divergence. We can see that our approach achieves the best performance in most of the cases.

| Dataset  | Average Test RMSE |                |               |              |                |                |                |                    |
|----------|-------------------|----------------|---------------|--------------|----------------|----------------|----------------|--------------------|
|          | $\beta = -1.0$    | $\beta = -0.5$ | $\alpha = -1$ | $\alpha = 0$ | $\alpha = 0.5$ | $\alpha = 1.0$ | $\alpha = 2.0$ | $\alpha = +\infty$ |
| Boston   | <b>2.828</b>      | 2.948          | 3.026         | 2.956        | 2.990          | 2.937          | 2.981          | 2.985              |
| Concrete | <b>5.371</b>      | 5.505          | 5.717         | 5.592        | 5.381          | 5.462          | 5.499          | 5.481              |
| Energy   | <b>1.377</b>      | 1.461          | 1.646         | 1.431        | 1.531          | 1.413          | 1.458          | 1.458              |
| Kin8nm   | 0.085             | 0.088          | 0.087         | 0.088        | <b>0.083</b>   | 0.084          | 0.084          | <b>0.083</b>       |
| Naval    | <b>0.001</b>      | <b>0.001</b>   | 0.003         | <b>0.001</b> | 0.004          | 0.005          | 0.004          | 0.004              |
| Combined | <b>4.116</b>      | 4.146          | 4.156         | 4.161        | 4.154          | 4.135          | 4.188          | 4.145              |
| Wine     | 0.636             | <b>0.632</b>   | <b>0.632</b>  | 0.634        | 0.634          | 0.633          | 0.635          | 0.634              |
| Yacht    | 0.849             | <b>0.788</b>   | 1.478         | 0.861        | 1.146          | 1.221          | 1.222          | 1.234              |
| Protein  | <b>4.487</b>      | 4.531          | 4.550         | 4.565        | 4.564          | 4.658          | 4.777          | 4.579              |
| Year     | <b>8.831</b>      | 8.839          | 8.841         | 8.859        | 8.985          | 9.160          | 9.028          | 9.086              |

  

| dataset  | Average Test Log-likelihood |                |               |              |                |                |                |                    |
|----------|-----------------------------|----------------|---------------|--------------|----------------|----------------|----------------|--------------------|
|          | $\beta = -1.0$              | $\beta = -0.5$ | $\alpha = -1$ | $\alpha = 0$ | $\alpha = 0.5$ | $\alpha = 1.0$ | $\alpha = 2.0$ | $\alpha = +\infty$ |
| Boston   | <b>-2.476</b>               | -2.523         | -2.561        | -2.547       | -2.506         | -2.493         | -2.516         | -2.509             |
| Concrete | <b>-3.099</b>               | -3.133         | -3.171        | -3.149       | -3.103         | -3.106         | -3.116         | -3.109             |
| Energy   | <b>-1.758</b>               | -1.814         | -1.946        | -1.795       | -1.854         | -1.801         | -1.828         | -1.832             |
| Kin8nm   | 1.055                       | 1.017          | 1.024         | 1.012        | 1.080          | 1.075          | 1.074          | <b>1.085</b>       |
| Naval    | <b>5.468</b>                | 5.347          | 4.178         | 5.269        | 4.086          | 4.022          | 4.077          | 4.037              |
| Combined | <b>-2.835</b>               | -2.842         | -2.845        | -2.845       | -2.843         | -2.839         | -2.850         | -2.842             |
| Wine     | -0.962                      | <b>-0.956</b>  | -0.961        | -0.959       | -0.971         | -0.968         | -0.972         | -0.971             |
| Yacht    | <b>-1.711</b>               | -1.718         | -2.201        | -1.751       | -1.875         | -1.946         | -1.963         | -1.986             |
| Protein  | <b>-2.921</b>               | -2.930         | -2.934        | -2.938       | -2.928         | -2.930         | -2.947         | -2.932             |
| Year     | -3.570                      | -3.597         | -3.599        | -3.600       | <b>-3.518</b>  | -3.529         | -3.524         | -3.524             |

Table 2: Test RMSE and LL results for Bayesian neural network regression.

## E Reinforcement Learning

In this section, we provide more information and results of the Reinforcement learning experiments, including comparisons of algorithms using score-function gradient estimators (Algorithm 2).

### E.1 MuJoCo Environments

We test six MuJoCo environments in this paper: *HalfCheetah*, *Hopper*, *Swimmer(rllab)*, *Humanoid(rllab)*, *Walker*, and *Ant*, for which the dimensions of the action space are 6, 3, 2, 21, 6, 8, respectively. Figure 4 shows examples of the environment used in our experiments.

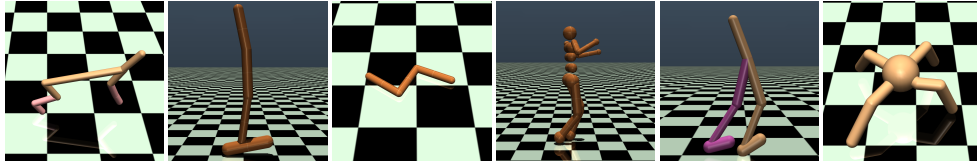

Figure 4: MuJoCo environments used in our reinforcement learning experiments. From left to right: HalfCheetah, Hopper, Swimmer(rllab), Humanoid(rllab), Walker, and Ant.

### E.2 Different Choices of $\alpha$

In this section, we present the average reward of  $\alpha$ -divergences with different choices of  $\alpha$  on Hopper and Walker with both score-function and reparameterization gradient estimators. We can see from Figure 5 that  $\alpha = 0.5$  and  $\alpha = +\infty$  (denoted by  $\alpha = \max$  in the legends) perform consistently better than standard KL divergence ( $\alpha = 0$ ), which is used the original SAC paper.

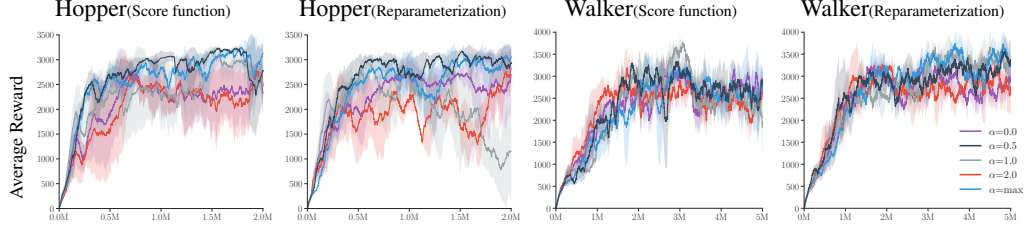

Figure 5: Results on Hopper and Walker with different choices of  $\alpha$ .

### E.3 Tail-adaptive $f$ -divergence with score function estimation

In this section, we investigate optimization with score function gradient estimators (Algorithm 2). The results in Figure 6 show that our tail-adaptive  $f$ -divergence tends to yield better performance across all environments tested.

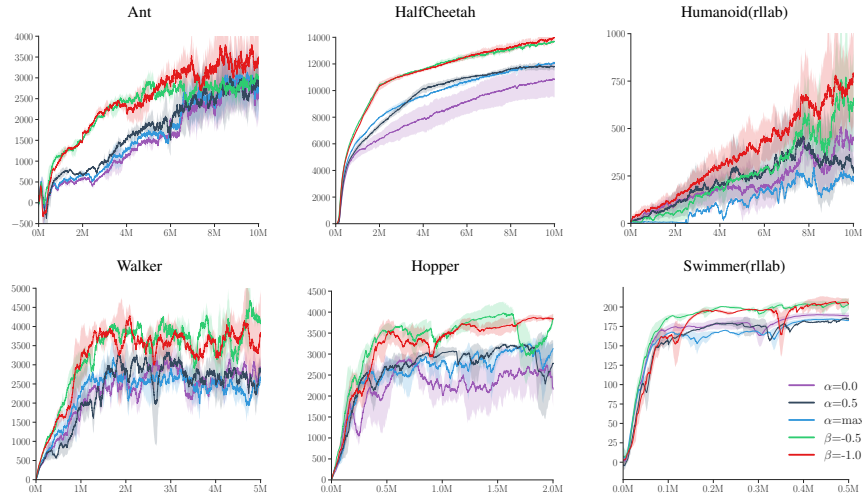

Figure 6: Results of average rewards with score function gradients.
